# Supplementary material for: An evaluation of longitudinal changes in serum uric acid levels and associated risk of cardio-metabolic events and renal function decline in gout
Source: PubMed Central journal article supplement (PMC5831471; doi:10.1371/journal.pone.0193622), 2018-02-28
Supplement: pone.0193622.s001.pdf [file pone.0193622.s001.pdf]

eFigure 1: Study design summary and weight calculation for the marginal structural model

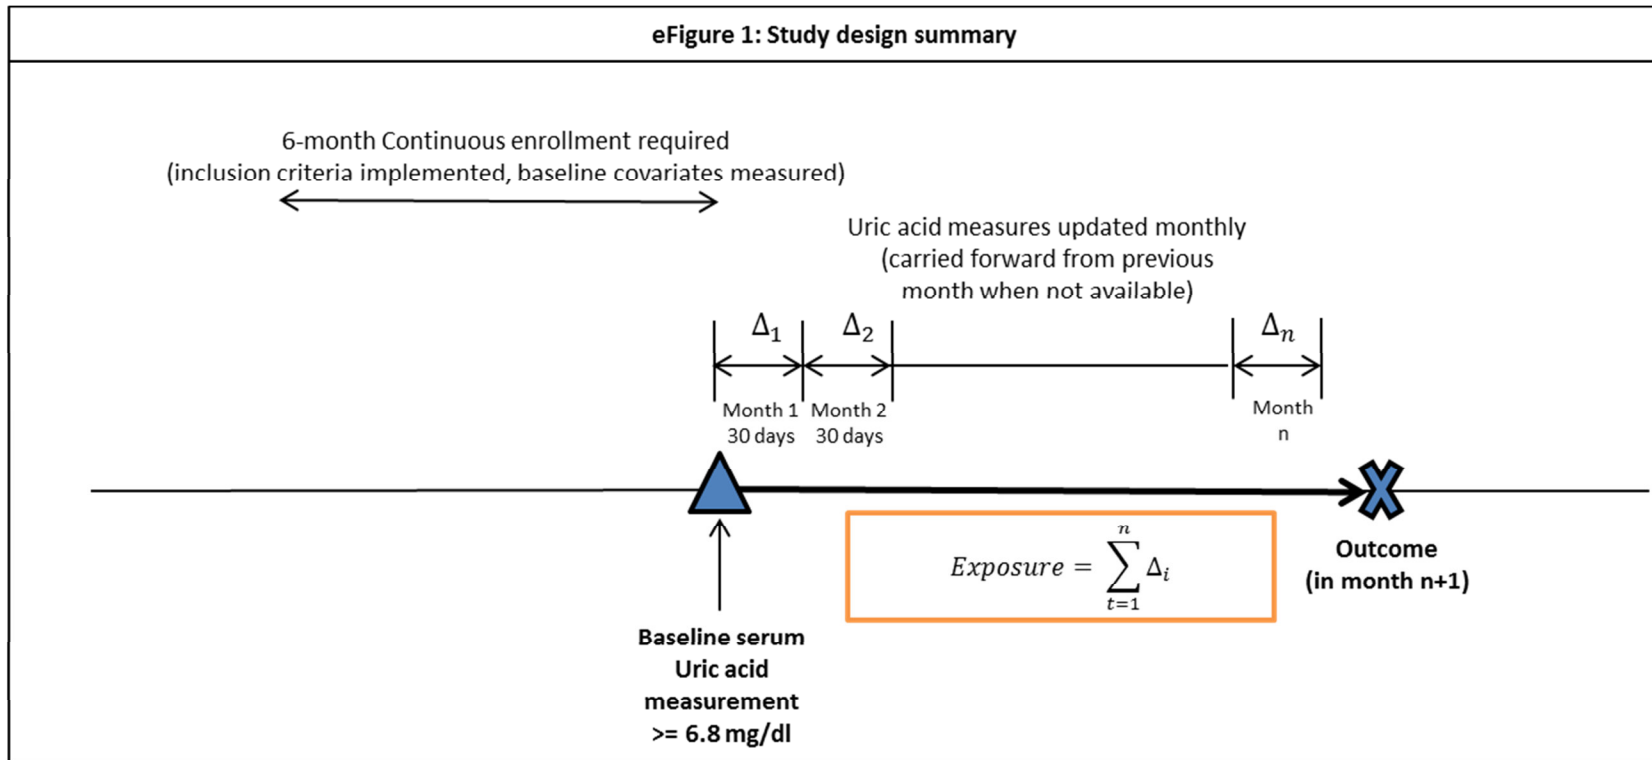

$$SW_{m+t}^A = \prod_{k=m}^{m+t} \frac{f(\Delta_k | \bar{\Delta}_{k-1}, L_0, \bar{D}_{k-1} = 0)}{f(\Delta_k | \bar{\Delta}_{k-1}, \bar{L}_k, \bar{D}_{k-1} = 0)}$$

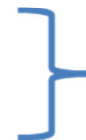

Both the numerator and denominator are probability density functions calculated from generalized linear regression models (assumed normal distribution and constant variance)

Where:

m = Baseline month

t = Month of follow-up

$\Delta_k$  = cumulative change in serum uric acid in month k

$\bar{\Delta}_{k-1}$  = cumulative change in serum uric acid up to month k-1

$L_0$  = Covariates measured at baseline (ie Time-fixed)

$\bar{L}_k$  = Covariates measured at baseline (ie Time-fixed) + updated monthly (ie Time-varying)

$(\bar{D}_{k-1} = 0)$  = Outcome not observed until month (k-1) and the patient is still at risk
