# Supplementary material for: An evaluation of longitudinal changes in serum uric acid levels and associated risk of cardio-metabolic events and renal function decline in gout
Source: PubMed Central journal article supplement (PMC5831471; doi:10.1371/journal.pone.0193622), 2018-02-28

eFigure 3: Weight distribution over time in each of the three study sub-cohorts

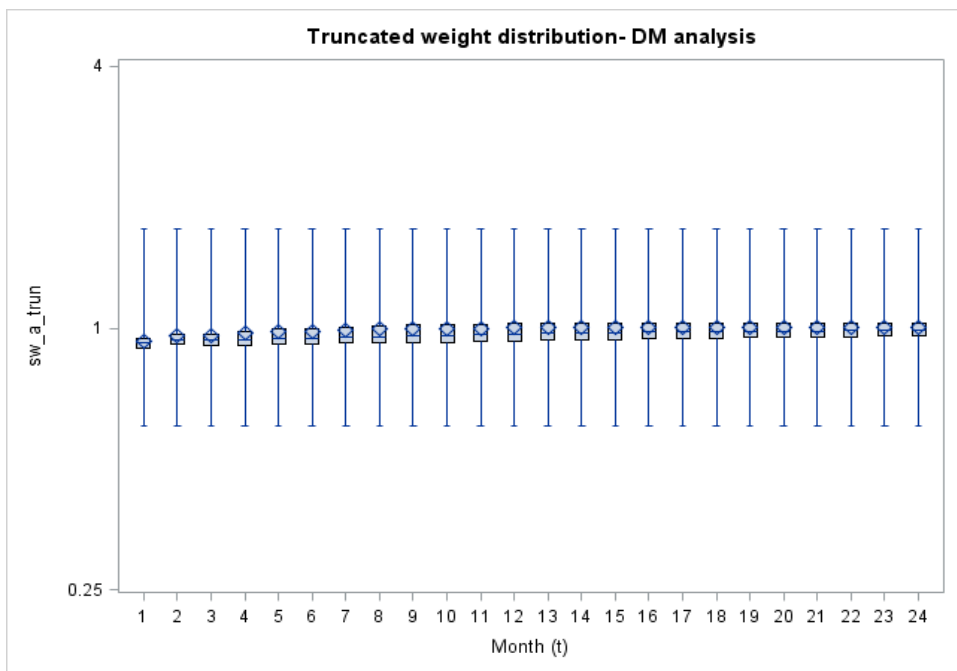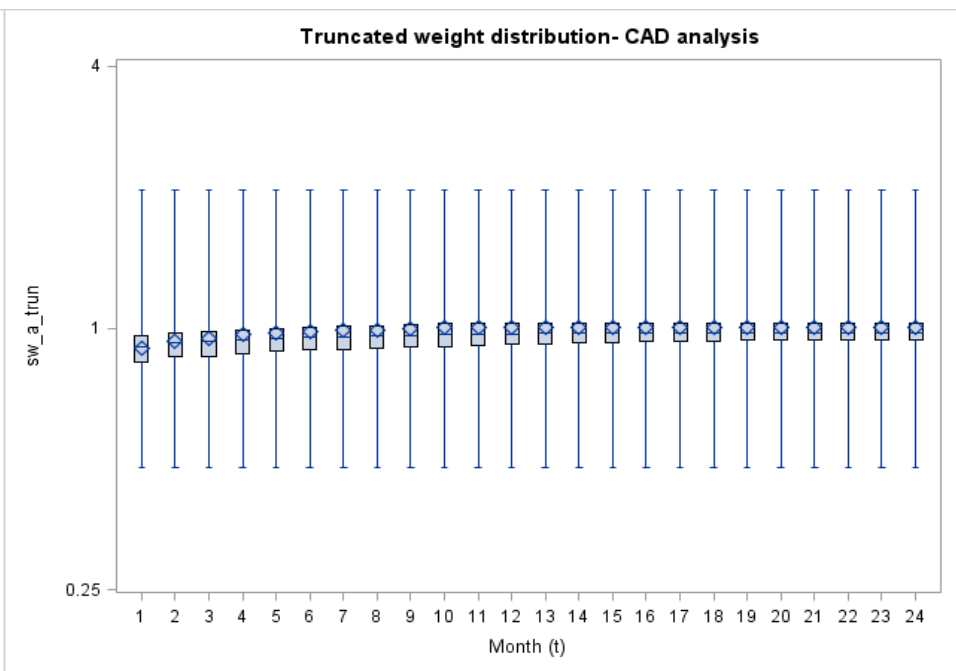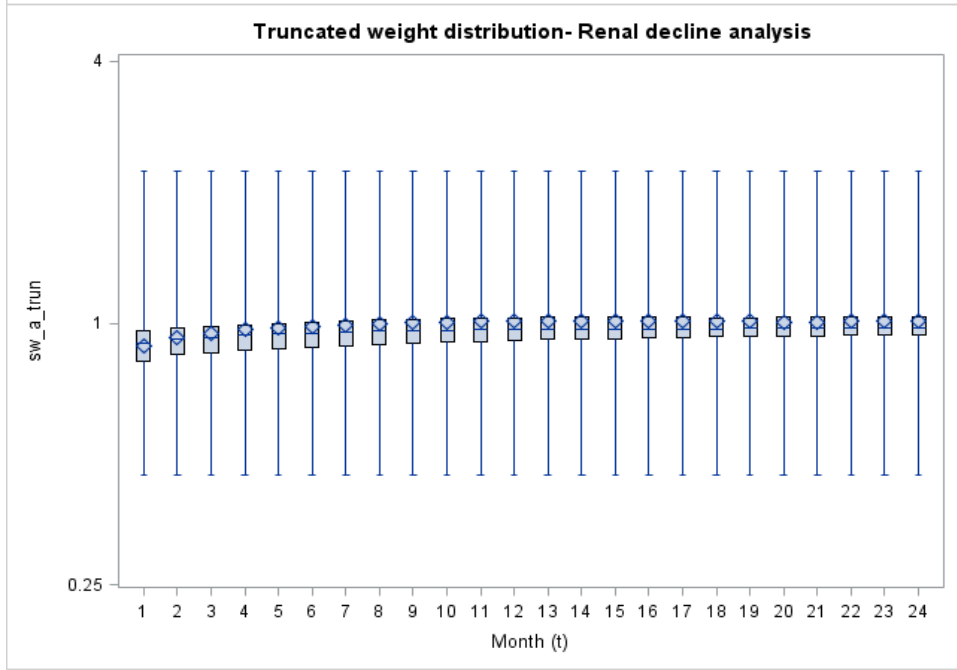

Supplement: pone.0193622.s003.pdf [file pone.0193622.s003.pdf]
